# Supplementary material
Source: Research Square preprint supplement (doi:10.21203/rs.3.rs-7977402/v1)
Supplement: Supplementary file 1 [file f8f023b73ff0d6df18c27de5.docx]

**COMPLETE CLINICAL TRIAL PROTOCOL**

**Protocol Title: A 12-Week Randomized Controlled Trial Comparing the Effects of Low Glycemic Index, High Glycemic Index, and Ketogenic Diets on Body Composition, Metabolic Parameters, and Aerobic Capacity in Endurance Athletes**

**Trial Registration:** CTRI/2025/11/097536 dated 20-11-2025

**Name and Address of Sponsor/Funder:**
This research received no external funding. This is an investigator-initiated trial.

**Principal Investigator:**
Dr. Harpreet Kour
Professor, Department of Physiology
Jawaharlal Nehru Medical College
KLE Academy of Higher Education and Research (KAHER)
Belagavi, Karnataka, India
Email: harpreetkour.kour@gmail.com
Phone: 9620850326

**Co-Investigators and Responsibilities:**

| Investigator | Affiliation | Role and Responsibilities |
| --- | --- | --- |
| Dr. Harpreet Kour | JNMC, KAHER Belagavi | Overall study design, supervision, protocol development, manuscript preparation |
| Dr. Hanjamam Barun | BHU Varanasi | Exercise physiology methodology, training program design and supervision |
| Ms. Geetalanji Bhide | Bhide's Nutrition & Research LLP, Pune | Nutritional intervention design, dietary monitoring, ketone verification |
| Ms. Namrata Pramod | Independent Researcher, Bangalore | Participant recruitment, data collection, data curation |
| Dr. Shrihari L Kulkarni | SDM Medical College, Dharwad | Clinical supervision, medical oversight, safety monitoring |
| Dr. Mayank V | KAHER Belagavi | Statistical analysis plan, data validation, statistical reporting |

**Research Sites:**

1. Department of Physiology, JNMC, KAHER Belagavi (Primary site for assessments)
2. Local running tracks and fitness centers in Belagavi and Dharwad districts (Training sites)

**Clinical Laboratory:**
Dr Prabhakar Kore Hospital and Medical Research Centre. The laboratory is NABH accredited and follows standardized procedures for all assays.

**1. PROJECT SUMMARY**

This randomized controlled trial aims to compare the effects of three dietary strategies low glycemic index (Low-GI), high glycemic index (High-GI), and ketogenic (LCHF) dietscombined with endurance training on body composition, metabolic health, and aerobic capacity in male endurance athletes. Despite growing interest in carbohydrate manipulation for athletic performance, direct comparative evidence is lacking. Fifty-seven trained male runners aged 18–50 years will be randomly assigned to one of three dietary groups for 12 weeks while following a standardized training program. Primary outcomes include changes in body composition (assessed via bioelectrical impedance) and maximal oxygen uptake (VO₂ max, measured via direct gas analysis during Bruce Protocol treadmill testing). Secondary outcomes encompass fasting blood glucose, lipid profile, thyroid function, perceived exertion, and training volume. Assessments will occur at baseline and post-intervention. We hypothesize that Low-GI and LCHF diets will yield superior improvements in body composition and subjective training responses compared to High-GI diets. Findings will provide evidence-based dietary recommendations for endurance athletes and clarify the trade-offs between different nutritional approaches. The study has received ethical approval from the JNMC Institutional Ethics Committee (Ref: MDC/JNMCIEC/567) and is registered prospectively with the Clinical Trials Registry of India.

**2. RATIONALE AND BACKGROUND INFORMATION**

**2.1 Problem Statement**

Endurance athletes face the challenge of optimizing both training and nutrition to maximize performance. While the physiological adaptations to endurance training including enhanced maximal oxygen uptake (VO₂ max), mitochondrial biogenesis, and substrate utilization are well-documented, the optimal dietary strategy to support these adaptations remains controversial. Two primary dietary approaches have gained attention: manipulation of carbohydrate quality through the glycemic index (GI) and radical alteration of macronutrient composition through ketogenic diets. Despite their popularity, direct comparative evidence evaluating these strategies within a homogeneous athletic population undergoing standardized training is scarce.

**2.2 Current Knowledge Gap**

The current literature presents fragmented evidence:

- Studies investigating Low-GI diets suggest benefits for metabolic stability and fat oxidation during prolonged exercise.
- Research on High-GI diets focuses primarily on their role in rapid glycogen resynthesis during recovery.
- Ketogenic diet studies report enhanced fat oxidation but raise concerns about high-intensity performance capacity.

However, these studies typically examine diets in isolation, use heterogeneous populations, employ different training protocols, or have short durations. This fragmentation creates a significant evidence gap regarding the comparative effectiveness of these dietary approaches for endurance athletes.

**2.3 Study Justification**

This study addresses this critical gap by conducting a head-to-head comparison of Low-GI, High-GI, and ketogenic diets within a controlled trial design featuring:

- Homogeneous population of trained endurance athletes
- Standardized endurance training program for all participants
- Comprehensive outcome assessment including body composition, metabolic parameters, and performance metrics
- Sufficient duration (12 weeks) to observe meaningful adaptations

The findings will provide evidence-based guidance for athletes, coaches, and sports nutritionists regarding dietary strategy selection for endurance training optimization.

**3. STUDY GOALS AND OBJECTIVES**

**3.1 Overall Goal**

To determine the comparative efficacy of Low-GI, High-GI, and ketogenic diets in optimizing training adaptations, metabolic health, and subjective training responses in endurance athletes.

**3.2 Primary Objective**

To compare the effects of 12-week interventions with Low-GI, High-GI, or ketogenic diets on changes in:

1. Body composition (body fat percentage and fat mass)
2. Maximal oxygen consumption (VO₂ max)
   in trained male endurance athletes.

**3.3 Secondary Objectives**

1. To assess the impact of these dietary interventions on metabolic markers:
   - Fasting blood glucose
   - Lipid profile (total cholesterol, LDL-C, HDL-C, triglycerides)
   - Thyroid-stimulating hormone (TSH)
2. To evaluate differences in subjective training responses using the Borg Rate of Perceived Exertion (RPE) scale (6-20).
3. To compare changes in training volume (weekly running mileage in km) across dietary groups.
4. To document dietary adherence and safety profiles of each intervention.
5. To examine the relationship between dietary macronutrient composition and training adaptations.

**3.4 Hypotheses**

1. **Primary Hypothesis:** Low-GI and ketogenic diets will result in superior improvements in body composition (greater reduction in body fat percentage) compared to the High-GI diet.
2. **Secondary Hypothesis:** The ketogenic diet will yield similar improvements in VO₂ max compared to carbohydrate-based diets, despite carbohydrate restriction.
3. **Exploratory Hypothesis:** Low-GI and ketogenic diets will be associated with more favorable subjective training responses (lower RPE) and greater training volume maintenance compared to the High-GI diet.

**4. STUDY DESIGN**

**4.1 Study Type**

Prospective, three-arm, parallel-group, randomized controlled superiority trial.

**4.2 Study Framework**

Superiority design comparing three active interventions with no placebo group.

**4.3 Allocation Ratio**

1:1:1 randomization to three intervention groups.

**4.4 Study Setting**

- **Primary Assessment Site:** Department of Physiology, JNMC, KAHER Belagavi
- **Training Sites:** Designated running tracks and fitness centers in Belagavi and Dharwad districts
- **Dietary Counseling:** Individual and group sessions at research site

**4.5 Study Population**

**Target Population:** Trained male endurance athletes in Karnataka, India.

**Sample Size:** 57 participants (19 per group).

**Sample Size Calculation:**

- Based on detecting moderate effect size (Cohen's d = 0.40) for VO₂ max changes
- α = 0.05, power = 80%
- Using Cohen's d formula and reference to similar studies (Zdzieblik et al., 2022)
- Accounting for potential attrition (estimated <10%)
- Calculation performed using G*Power software

**Inclusion Criteria:**

1. Male gender
2. Age 18–50 years
3. Minimum of 2 years of endurance training experience
4. Current weekly running mileage ≥40 km
5. Active participation in marathons or half-marathons
6. Stable training regimen for ≥6 months prior to study
7. Willing and able to provide written informed consent
8. Willing to adhere to assigned dietary intervention for 12 weeks

**Exclusion Criteria:**

1. History of cardiovascular, respiratory, metabolic, or endocrine disease
2. Use of medications affecting metabolism, body composition, or cardiovascular function (e.g., beta-blockers, steroids, thyroid medication)
3. Body mass index (BMI) >30 kg/m²
4. Significant changes in diet or training regimen within past 6 months
5. Smoking or use of tobacco products
6. Excessive alcohol consumption (>3 standard drinks per day)
7. Known food allergies or intolerances affecting ability to follow assigned diet
8. Inability to complete baseline testing procedures
9. Participation in another clinical trial within past 3 months

**Withdrawal Criteria:**

1. Voluntary withdrawal of consent at any time
2. Development of any exclusion criteria during the study
3. Non-adherence to intervention protocols (<80% adherence based on food records)
4. Injury or illness preventing continued participation in training program
5. Loss to follow-up (failure to attend >2 consecutive assessment visits)

**4.6 Study Duration**

- **Total study duration:** 12 months
- **Recruitment period:** 6 months
- **Intervention period per participant:** 12 weeks
- **Follow-up period per participant:** 1 week (post-intervention assessment)
- **Total participant involvement:** 13 weeks (including baseline and post-intervention assessments)

**4.7 Timeline**

| Phase | Duration | Activities |
| --- | --- | --- |
| Preparation | Month 1 | Protocol finalization, ethics approval, site preparation |
| Recruitment | Months 2-7 | Participant screening, enrollment, baseline assessments |
| Intervention | Months 2-10 | 12-week intervention for each participant cohort |
| Follow-up | Months 3-11 | Post-intervention assessments |
| Data Analysis | Month 12 | Statistical analysis, interpretation |
| Reporting | Month 13 | Manuscript preparation, dissemination |

**5. METHODOLOGY**

**5.1 Recruitment Strategy**

1. **Identification:** Through local running clubs, athletic events, sports academies, and social media platforms targeting endurance athletes in Belagavi and Dharwad districts.
2. **Screening:** Initial telephone screening followed by in-person screening visit.
3. **Informed Consent:** Written informed consent obtained during screening visit after detailed explanation of study procedures, risks, and benefits.

**5.2 Randomization**

1. **Sequence Generation:** Computer-generated random allocation sequence using block randomization with varying block sizes (sizes 3, 6, 9) to ensure balanced group allocation.
2. **Allocation Concealment:** Sequentially numbered, opaque, sealed envelopes (SNOSE technique) prepared by a statistician not involved in recruitment or assessment.
3. **Implementation:** Envelopes opened by research staff after baseline assessments completed and participant enrolled.

**5.3 Blinding**

1. **Participant Blinding:** Not feasible due to nature of dietary interventions.
2. **Outcome Assessor Blinding:** Research staff conducting physiological and biochemical assessments will be blinded to group allocation.
3. **Data Analyst Blinding:** Statistician will analyze data using coded group identifiers.

**5.4 Interventions**

**Dietary Interventions**

All participants will receive individualized dietary guidance from a registered sports nutritionist.

**Group A: Low-Glycemic Index Diet (Low-GI)**

- **Macronutrient Distribution:**
  - Carbohydrates: 55-60% of total daily energy intake
  - Protein: 15-20%
  - Fat: 20-25%
- **Carbohydrate Quality:** >65% of carbohydrate calories from low-GI sources (GI <55)
- **Food Examples:** Whole grains, legumes, non-starchy vegetables, most fruits
- **Energy Intake:** Individualized based on baseline assessment and training load

**Group B: High-Glycemic Index Diet (High-GI)**

- **Macronutrient Distribution:**
  - Carbohydrates: 55-60% of total daily energy intake
  - Protein: 15-20%
  - Fat: 20-25%
- **Carbohydrate Quality:** >65% of carbohydrate calories from high-GI sources (GI >70)
- **Food Examples:** White bread, white rice, potatoes, sugary cereals
- **Energy Intake:** Individualized based on baseline assessment and training load

**Group C: Ketogenic Diet (LCHF)**

- **Macronutrient Distribution:**
  - Fat: >70% of total daily energy intake
  - Protein: 15-20%
  - Carbohydrates: <50 g daily (<10% of total energy)
- **Ketosis Verification:** Weekly capillary blood ketone (β-hydroxybutyrate) measurement using handheld meter (target: >0.5 mmol/L)
- **Food Examples:** Avocados, nuts, seeds, olive oil, coconut oil, fatty fish, meat, eggs, non-starchy vegetables
- **Energy Intake:** Individualized based on baseline assessment and training load

**Dietary Adherence Monitoring**

1. **3-Day Weighed Food Records:** Participants will complete detailed food records for 2 weekdays and 1 weekend day every two weeks.
2. **24-Hour Dietary Recalls:** Unannounced telephone recalls on random days.
3. **Ketone Monitoring:** Weekly capillary blood ketone measurements for LCHF group.
4. **Dietary Counseling:** Weekly individual or group sessions with nutritionist.

**Exercise Training Intervention**

All participants will follow an identical, supervised endurance running program:

**Program Structure:**

- **Frequency:** 5 sessions per week
- **Duration:** 12 weeks
- **Progression:** Volume and intensity increased every 3 weeks

**Session Types:**

1. **Easy Runs:** 30-45 minutes at 60-70% of heart rate reserve (HRR)
2. **Long Runs:** 60-90 minutes at 70-75% HRR
3. **Interval Training:** 6-8 repetitions of 800m at 90-95% VO₂ max pace with 400m active recovery
4. **Tempo Runs:** 20-40 minutes at 80-85% HRR (lactate threshold pace)

**Training Monitoring:**

- Heart rate monitors (Garmin, USA) for all sessions
- Training logs recording distance, duration, and RPE
- Weekly training load calculation (session RPE × duration)
- Supervised sessions for technique and adherence

**5.5 Outcome Measures**

**Primary Outcomes**

1. **Body Composition**
   - **Measurement:** Bioelectrical impedance analysis (InBody 770)
   - **Variables:** Body fat percentage (%), fat mass (kg), fat-free mass (kg), visceral fat area
   - **Timepoints:** Baseline (Week 0), Post-intervention (Week 12)
   - **Procedure:** Standardized pre-test protocol (fasted, well-hydrated, no exercise for 24h)
2. **Maximal Oxygen Uptake (VO₂ max)**
   - **Measurement:** Direct gas analysis during graded exercise test
   - **Protocol:** Bruce Protocol on motorized treadmill
   - **Equipment:** Metabolic cart (Cosmed Quark CPET) for breath-by-breath analysis
   - **Definition:** Highest 30-second average oxygen consumption
   - **Timepoints:** Baseline (Week 0), Post-intervention (Week 12)

**Secondary Outcomes**

1. **Metabolic Parameters** (Fasting blood samples)
   - Fasting blood glucose (enzymatic colorimetric method)
   - Lipid profile: Total cholesterol, LDL-C, HDL-C, triglycerides (enzymatic assays)
   - Thyroid-stimulating hormone (chemiluminescent immunoassay)
   - **Timepoints:** Baseline (Week 0), Post-intervention (Week 12)
2. **Training Responses**
   - Rate of Perceived Exertion (Borg 6-20 scale) for each session
   - Weekly running mileage (km)
   - Training load (session RPE × duration)
   - **Timepoints:** Weekly throughout 12-week intervention
3. **Dietary Adherence**
   - Macronutrient intake (grams/day, percentage of energy)
   - Total energy intake (kcal/day)
   - Ketone levels (LCHF group only)
   - **Timepoints:** Every two weeks (food records), weekly (ketones)

**Safety Outcomes**

1. Adverse events related to dietary intervention
2. Changes in lipid profile outside normal ranges
3. Symptoms of hypoglycemia or excessive fatigue
4. Injury or illness preventing training

**5.6 Assessment Schedule**

| Assessment | Screening | Baseline (Week 0) | During Intervention | Post-intervention (Week 12) |
| --- | --- | --- | --- | --- |
| Informed Consent | X |  |  |  |
| Eligibility Screening | X |  |  |  |
| Medical History | X |  |  |  |
| Anthropometry |  | X |  | X |
| Body Composition (BIA) |  | X |  | X |
| VO₂ max Test |  | X |  | X |
| Blood Collection |  | X |  | X |
| Dietary Assessment |  | X | Every 2 weeks | X |
| Training Log Review |  |  | Weekly |  |
| RPE Recording |  |  | Each session |  |
| Adverse Event Check |  |  | Weekly | X |

**5.7 Data Collection Methods**

**Anthropometric Measurements**

- **Height:** Stadiometer to nearest 0.1 cm
- **Weight:** Calibrated electronic scale to nearest 0.1 kg
- **Waist and Hip Circumference:** Non-elastic tape measure to nearest 0.1 cm (duplicate measurements)
- **BMI:** Calculated as weight(kg)/height(m)²

**Blood Sample Collection and Processing**

1. **Collection:** ~10 mL venous blood after 12-hour overnight fast
2. **Processing:** Centrifugation at 3000 rpm for 15 minutes
3. **Storage:** Serum aliquoted and stored at -80°C until analysis
4. **Analysis:** Standardized enzymatic and immunoassay methods in accredited laboratory

**Training Data Collection**

1. **Training Logs:** Standardized templates for recording distance, duration, RPE
2. **Heart Rate Data:** Downloaded from monitors weekly
3. **Attendance Records:** For supervised sessions

**Dietary Data Collection**

1. **Food Records:** Weighed food records with detailed descriptions
2. **Dietary Analysis:** Using standardized software (Nutritics)
3. **Ketone Monitoring:** Capillary blood samples with handheld meter

**5.8 Quality Control**

1. **Standardized Protocols:** All measurements follow standardized operating procedures
2. **Equipment Calibration:** Regular calibration of all measurement devices
3. **Training of Staff:** All research staff trained in protocol implementation
4. **Data Verification:** Double data entry with validation checks
5. **Monitoring:** Regular monitoring visits to ensure protocol adherence

**6. DATA MANAGEMENT AND STATISTICAL ANALYSIS**

**6.1 Data Management**

1. **Data Collection Forms:** Standardized case report forms (CRFs)
2. **Data Entry:** Double data entry with validation
3. **Database:** Secure electronic database with password protection
4. **Data Storage:** Physical forms in locked cabinets; electronic data on secure servers
5. **Data Retention:** 5 years after study completion as per regulatory requirements
6. **Confidentiality:** Participant identification numbers used; master list kept separately

**6.2 Statistical Analysis Plan**

**Analysis Principles**

1. **Analysis Sets:**
   - Intention-to-treat (ITT): All randomized participants
   - Per-protocol (PP): Participants with ≥80% adherence
2. **Missing Data:** Multiple imputation if <10% missing; sensitivity analyses
3. **Statistical Software:** IBM SPSS Statistics version 29
4. **Significance Level:** α = 0.05 (two-tailed)

**Descriptive Statistics**

- Continuous variables: Mean ± standard deviation (SD)
- Categorical variables: Frequency (percentage)
- Baseline comparisons between groups: ANOVA or Kruskal-Wallis test

**Primary Analysis**

**Method:** Mixed-model repeated measures analysis of variance (rmANOVA)
**Factors:**

- Within-subject: Time (baseline, 12 weeks)
- Between-subject: Group (Low-GI, High-GI, LCHF)
  **Tests:**

1. Main effect of Time (overall changes)
2. Main effect of Group (between-group differences)
3. Time × Group interaction (differential changes)
   **Assumption Checks:**

- Normality: Shapiro-Wilk test
- Sphericity: Mauchly's test (Greenhouse-Geisser correction if violated)
- Homogeneity of variance: Levene's test
  **Post-hoc Tests:** Bonferroni-adjusted pairwise comparisons for significant effects
  **Effect Sizes:** Partial η² for ANOVA; Cohen's d for pairwise comparisons

**Secondary Analyses**

1. **Within-group changes:** Paired t-tests or Wilcoxon signed-rank tests
2. **Correlational analyses:** Pearson or Spearman correlations between dietary variables and outcomes
3. **Adherence analyses:** Comparison of per-protocol vs intention-to-treat results
4. **Subgroup analyses:** By baseline characteristics if sample permits

**Sample Size Justification**

Based on detecting moderate effect size (f = 0.25) in repeated measures ANOVA:

- Power = 80%
- α = 0.05
- Correlation among repeated measures = 0.5
- Required sample = 54 (18 per group)
- Accounting for 5% attrition: 57 total (19 per group)

**Interim Analysis**

No interim analyses planned as study duration is short and risks are minimal.

**6.3 Safety Monitoring**

1. **Adverse Event Reporting:** All adverse events recorded and reported to ethics committee
2. **Data Monitoring Committee:** Not required due to low-risk nature
3. **Stopping Rules:** Study may be stopped for:
   - Serious adverse events related to intervention
   - Evidence of significant harm in any group
   - Futility (clear lack of between-group differences early in trial)

**7. ETHICAL CONSIDERATIONS**

**7.1 Ethical Approval**

The study protocol has been approved by the JNMC Institutional Ethics Committee (Ref: MDC/JNMCIEC/567; dated 28 August 2024).

**7.2 Informed Consent Process**

1. **Information Sheet:** Detailed participant information sheet in local language
2. **Consent Form:** Written informed consent obtained before any study procedures
3. **Consent Documentation:** Signed forms kept securely; copies provided to participants
4. **Ongoing Consent:** Participants may withdraw consent at any time without penalty

**7.3 Risk-Benefit Assessment**

**Potential Risks:**

1. **Dietary Intervention Risks:**
   - Discomfort with dietary changes
   - Gastrointestinal symptoms
   - Nutrient deficiencies if poorly implemented
   - Lipid profile changes (particularly LCHF group)
2. **Exercise Testing Risks:**
   - Musculoskeletal injury
   - Cardiovascular stress
   - Fatigue
3. **Blood Sampling Risks:**
   - Bruising, pain, infection at venipuncture site
   - Vasovagal reaction

**Risk Mitigation Strategies:**

1. Medical screening to exclude high-risk individuals
2. Gradual introduction of dietary changes
3. Supervised exercise sessions with qualified personnel
4. Standardized venipuncture procedures by trained phlebotomist
5. Emergency equipment and personnel available during testing
6. Regular monitoring for adverse events

**Potential Benefits:**

1. **Direct Benefits:**
   - Free comprehensive fitness and metabolic assessment
   - Individualized dietary counseling
   - Structured training program
   - Knowledge about personal response to different diets
2. **Indirect Benefits:**
   - Contribution to scientific knowledge
   - Improved understanding of nutrition for endurance sports
   - Potential performance enhancement

**7.4 Confidentiality**

1. **Data Protection:** Personal identifiers removed; coded data used for analysis
2. **Access Restrictions:** Only authorized research personnel access identifiable data
3. **Publication:** Group-level results only; no individual identification
4. **Data Sharing:** De-identified data available on reasonable request after publication

**7.5 Compensation**

No financial compensation provided. Participants receive free assessments and consultations.

**7.6 Vulnerable Populations**

No vulnerable populations included. All participants competent adults capable of providing consent.

**8. DISSEMINATION PLAN**

**8.1 Publication Plan**

1. **Primary Manuscript:** Results submitted to peer-reviewed sports science/nutrition journal
2. **Secondary Papers:** Subgroup analyses or mechanistic papers as appropriate
3. **Conference Presentations:** National and international sports science conferences
4. **Open Access:** Commitment to open access publication when possible

**8.2 Data Sharing**

1. **De-identified Data:** Available to qualified researchers upon reasonable request
2. **Statistical Code:** Available upon request
3. **Protocol:** Published as supplementary material or in protocol registry

**8.3 Stakeholder Engagement**

1. **Participants:** Summary of results provided to all participants
2. **Coaches and Athletes:** Findings disseminated through workshops and presentations
3. **Scientific Community:** Through publications and conference presentations
4. **Public:** Lay summaries through appropriate media channels

**8.4 Authorship**

Authorship determined by ICMJE criteria. All authors must:

1. Contribute substantially to conception/design or data acquisition/analysis/interpretation
2. Draft or critically revise manuscript
3. Approve final version
4. Agree to be accountable for all aspects of the work

**9. BUDGET AND RESOURCES**

**9.1 Resource Requirements**

1. **Personnel:** Research coordinator, nutritionist, exercise physiologist, phlebotomist
2. **Equipment:** BIA device, metabolic cart, treadmill, centrifuges, laboratory equipment
3. **Supplies:** Blood collection tubes, reagents, dietary assessment tools, training logs
4. **Facilities:** Assessment rooms, laboratory space, training venues

**9.2 Budget Justification**

Detailed budget available upon request. Major categories include:

1. Personnel costs
2. Laboratory consumables
3. Equipment maintenance/calibration
4. Participant compensation (assessment costs covered)
5. Data management and analysis
6. Publication costs

**9.3 Funding Source**

Investigator-initiated study with institutional support. No external funding received.

**10. REGULATORY COMPLIANCE**

**10.1 Regulatory Requirements**

1. **CTRI Registration:** Prospectively registered with Clinical Trials Registry - India
2. **Ethics Committee:** Annual reports submitted
3. **Protocol Amendments:** Submitted to ethics committee for approval before implementation
4. **Safety Reporting:** Serious adverse events reported within 24 hours

**10.2 Monitoring and Auditing**

1. **Internal Monitoring:** Monthly review by principal investigator
2. **Ethics Committee Monitoring:** As per committee requirements
3. **Data Audits:** Random audits of 10% of case report forms

**10.3 Protocol Amendments**

Any protocol amendments will be:

1. Documented with rationale
2. Submitted to ethics committee for approval
3. Implemented only after approval
4. Communicated to all relevant parties
5. Updated in trial registry

**11. APPENDICES**

**Appendix A: Participant Information Sheet and Consent Form**

**Appendix B: Case Report Forms**

**Appendix C: Standard Operating Procedures**

**Appendix D: Dietary Guidelines for Each Group**

**Appendix E: Training Program Details**

**Appendix F: Adverse Event Reporting Form**

**12. REFERENCES**

1. Thomas DT, Erdman KA, Burke LM. American College of Sports Medicine Joint Position Statement. Nutrition and Athletic Performance. Med Sci Sports Exerc. 2016 Mar;48(3):543-68.
2. Bassett DR Jr, Howley ET. Limiting factors for maximum oxygen uptake and determinants of endurance performance. Med Sci Sports Exerc. 2000 Jan;32(1):70-84.
3. Zdzieblik D, Friesenborg H, Gollhofer A, König D. A high carbohydrate diet with a low glycaemic index improves training effects in male endurance athletes. Int J Food Sci Nutr. 2022;73(7):965-972.
4. Burke LM, Ross ML, Garvican-Lewis LA, et al. Low carbohydrate, high fat diet impairs exercise economy and negates the performance benefit from intensified training in elite race walkers. J Physiol. 2017 May 1;595(9):2785-2807.
5. Volek JS, Noakes T, Phinney SD. Rethinking fat as a fuel for endurance exercise. Eur J Sport Sci. 2015;15(1):13-20.
6. International Conference on Harmonisation. Guideline for Good Clinical Practice E6(R2). 2016.
7. World Medical Association. Declaration of Helsinki: Ethical Principles for Medical Research Involving Human Subjects. 2013.
8. CONSORT Group. CONSORT 2010 Statement: Updated guidelines for reporting parallel group randomised trials. BMJ. 2010;340:c332.

**Principal Investigator Signature:**  Dr Harpreet Kour

*This protocol follows the WHO-recommended format for clinical trial protocols and has been prepared in accordance with Good Clinical Practice guidelines.*
